# Supplementary material for: WBP1L regulates hematopoietic stem cell function and T cell development
Source: Frontiers journal article supplement (doi:10.3389/fimmu.2024.1421512), 2024-11-01
Supplement: Data_Sheet_1.pdf [file Data_Sheet_1.pdf]

## Supplementary Material

### 1 Supplementary Figures and Tables

#### 1.1 Supplementary Figures

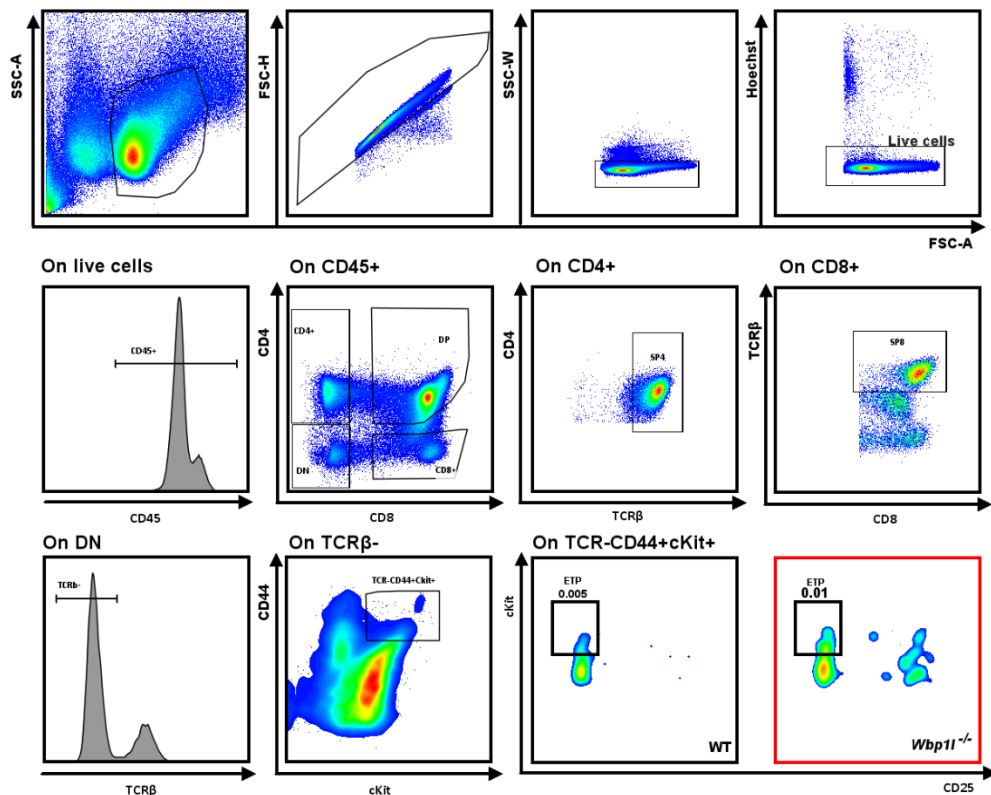

**Supplementary Figure 1. Gating strategy for thymocyte subpopulations.** T cells are gated from live CD45<sup>+</sup> cells. SP4 (CD4<sup>+</sup>TCRβ<sup>+</sup>), SP8 (CD8<sup>+</sup>TCRβ<sup>+</sup>), double positive cells DP (CD4<sup>+</sup>CD8<sup>+</sup>) and double negative cells DN (CD4<sup>-</sup>CD8<sup>-</sup>). Early thymic progenitors (ETP) are gated on the DN TCRβ<sup>-</sup> population (CD44<sup>+</sup> c-Kit<sup>hi</sup>). ETP plots from WT or *Wbp1l*<sup>-/-</sup> are representative from one mouse each. Values represent the frequency from total thymocytes.

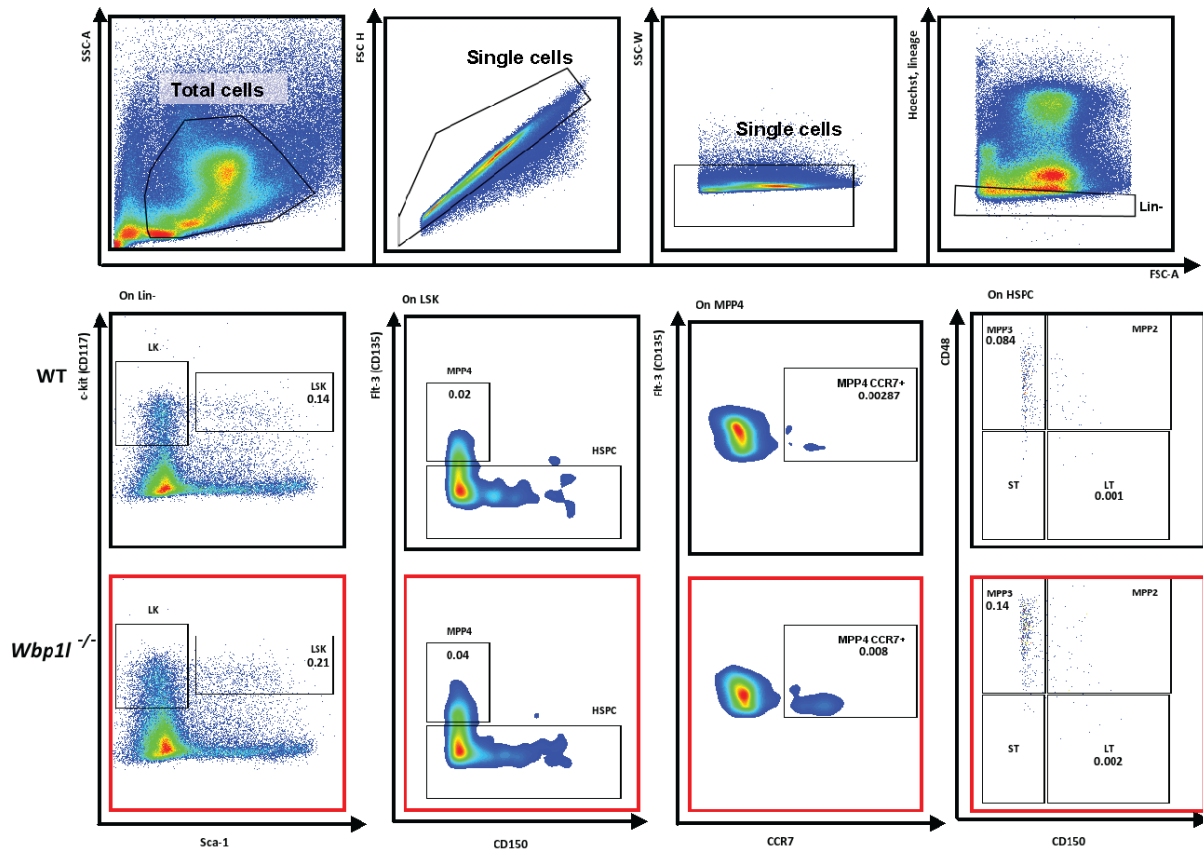

### Supplementary Figure 2. Gating strategy for multipotent progenitors in the bone marrow.

The multipotent progenitors are gated from live Lin<sup>-</sup> (CD3 $\epsilon$ <sup>-</sup>CD11b<sup>-</sup>Gr1<sup>-</sup>Ter119<sup>-</sup>B220<sup>-</sup>) population. LSK (Lin<sup>-</sup>Sca-1<sup>+</sup>c-Kit<sup>+</sup>), LK (Lin<sup>-</sup>Sca-1<sup>-</sup>c-Kit<sup>+</sup>). From LSKs, CD135<sup>+</sup> cells are the MPP4 multipotent progenitors (CD135<sup>+</sup>CD150<sup>-</sup>), from which MPP4 cells expressing CCR7 are derived (MPP4 CCR7<sup>+</sup>). Cells lacking the expression of CD135<sup>-</sup> constitute the pool of the HSPCs, from which, MPP2 (CD48<sup>+</sup>CD150<sup>+</sup>), MPP3 (CD48<sup>+</sup>CD150<sup>-</sup>), ST-HSC (ST, CD48<sup>-</sup>CD150<sup>+</sup>) and LT-HSC (LT, CD48<sup>-</sup>CD150<sup>+</sup>) are gated. The upper (WT) and lower (*Wbp1l*<sup>-/-</sup>) row show representative results from one mouse each. Values represent the frequency from total bone marrow cells. MPP4 CCR7<sup>+</sup> cells were analyzed independently.



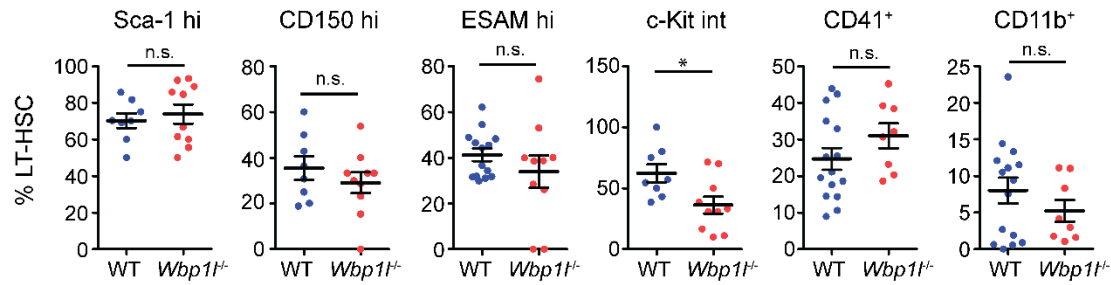

**Supplementary Figure 5. Markers of LT-HSC subsets.** Percentages of LT-HSC (LSK, CD150<sup>+</sup>CD48<sup>-</sup>) expressing (from left to right) high levels of Sca-1, CD150, ESAM, intermediate levels of c-Kit, and any level of CD41 and CD11b. For detection of CD11b, this marker was removed from the lineage cocktail. Values represent the frequency from LT-HSC. Each data point represents the value from one mouse. The line with error bars represents the average  $\pm$ SEM. Asterisk represents p value  $p < 0.05$ ; the rest is labeled n.s. (not significant).

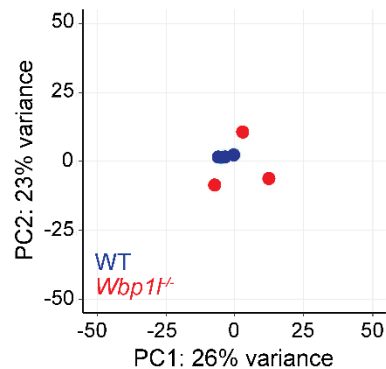

**Supplementary Figure 6. Principal component analysis of RNA profiling data.** The plot shows 3 WT (blue) and 3 *Wbp1*<sup>-/-</sup> (red) samples.

## 1.2 Supplementary Tables

**Supplementary Table 1. List of flow cytometry antibodies.**

| <b>Antibody</b>                                      | <b>Clone</b> | <b>Catalog number</b> | <b>Company</b>                               |
|------------------------------------------------------|--------------|-----------------------|----------------------------------------------|
| fluorescein isocyanate (FITC)-labeled anti-CD4       | GK1.5        | 100406                | BioLegend, San Diego, CA                     |
| PerCp/Cy5.5 – labeled anti-CD4                       | GK1.5        | 100434                | BioLegend, San Diego, CA                     |
| phycoerythrin (PE)-labeled anti-CD8 $\alpha$         | 53-6.7       | 100708                | BioLegend, San Diego, CA                     |
| PE/Cyanine7 anti-mouse CD8 $\alpha$                  | 53-6.7       | 100722                | BioLegend, San Diego, CA                     |
| FITC anti-mouse TCR $\beta$ chain                    | H57-597      | 109206                | BioLegend, San Diego, CA                     |
| allophycocyanine (APC)-labeled anti-CD3              | 17A2         | 100236                | BioLegend, San Diego, CA                     |
| APC/Cyanine7 anti-mouse TCR $\gamma/\delta$          | GL3          | 118143                | BioLegend, San Diego, CA                     |
| CD27 Monoclonal Antibody (LG.7F9), PerCP-eFluor™ 710 | LG.7F9       | 46-0271-82            | eBioscience™, Thermo Fisher Scientific, Inc. |
| PE anti-mouse CD25                                   | PC61         | 102008                | BioLegend, San Diego, CA                     |
| APC anti-mouse/human CD44                            | IM7          | 103012                | BioLegend, San Diego, CA                     |
| Brilliant Violet 711™ anti-mouse/human CD44          | IM7          | 103057                | BioLegend, San Diego, CA                     |
| Biotin anti-mouse CD135                              | A2F10        | 135307                | BioLegend, San Diego, CA                     |
| APC anti-mouse CD135                                 | A2F10        | 135310                | BioLegend, San Diego, CA                     |
| Brilliant Violet 785™ anti-mouse CD197 (CCR7)        | 4B12         | 120127                | BioLegend, San Diego, CA                     |

Supplementary Material

|                                                             |                                                         |        |                          |
|-------------------------------------------------------------|---------------------------------------------------------|--------|--------------------------|
| PE anti-mouse CD127 (IL-7R $\alpha$ )                       | A7R34                                                   | 135009 | BioLegend, San Diego, CA |
| PE anti-mouse ESAM                                          | 1G8/ESAM                                                | 136203 | BioLegend, San Diego, CA |
| APC/Cyanine7 anti-mouse CD41                                | MWReg30                                                 | 133927 | BioLegend, San Diego, CA |
| Brilliant violet 785 <sup>TM</sup> anti-mouse/human CD11b   | M1/70                                                   | 101243 | BioLegend, San Diego, CA |
| Alexa Fluor 700 (AF700)-labeled anti-CD45.2                 | 104                                                     | 109822 | BioLegend, San Diego, CA |
| Biotin anti-mouse CD45.2                                    | 104                                                     | 109804 | BioLegend, San Diego, CA |
| Biotin anti-mouse CD8 $\alpha$                              | 53-6.7                                                  | 100704 | BioLegend, San Diego, CA |
| APC anti-mouse/human CD11b                                  | M1/70                                                   | 101212 | BioLegend, San Diego, CA |
| Pacific Blue <sup>TM</sup> anti-mouse Lineage Cocktail      | 17A2;<br>RB6-8C5;<br>RA3-6B2;<br>Ter-119;<br>M1/70;     | 133310 | BioLegend, San Diego, CA |
| Pacific Blue <sup>TM</sup> anti-mouse CD4                   | GK1.5                                                   | 100428 | BioLegend, San Diego, CA |
| Pacific Blue <sup>TM</sup> anti-mouse CD8 $\alpha$          | 53-6.9                                                  | 100725 | BioLegend, San Diego, CA |
| Biotin anti-mouse Lineage Panel                             | 145-2C11;<br>RB6-8C5;<br>RA3-6B2;<br>Ter-119;<br>M1/70; | 133307 | BioLegend, San Diego, CA |
| PerCP/Cyanine5.5 anti-mouse CD117 (c-kit)                   | 2B8                                                     | 105824 | BioLegend, San Diego, CA |
| Brilliant Violet 605 <sup>TM</sup> anti-mouse CD117 (c-Kit) | 2B8                                                     | 105847 | BioLegend, San Diego, CA |

|                                                  |              |            |                                             |
|--------------------------------------------------|--------------|------------|---------------------------------------------|
| FITC anti-mouse CD117 (c-Kit)                    | 2B8          | 105806     | BioLegend, San Diego, CA                    |
| Brilliant Violet 650™ anti-mouse Ly-6A/E (Sca-1) | D7           | 108143     | BioLegend, San Diego, CA                    |
| Alexa Fluor® 700 anti-mouse Ly-6A/E (Sca-1)      | D7           | 108142     | BioLegend, San Diego, CA                    |
| Biotin anti-mouse Ly-6A/E (Sca-1)                | E13-161.7    | 122504     | BioLegend, San Diego, CA                    |
| PE anti-mouse CD48                               | HM48-1       | 103406     | BioLegend, San Diego, CA                    |
| CD34 Monoclonal Antibody (RAM34), FITC           | RAM34        | 11-0341-85 | Invitrogen™, Thermo Fisher Scientific, Inc. |
| PE/Cyanine7 anti-mouse CD16/32                   | 93           | 101318     | BioLegend, San Diego, CA                    |
| PE/Cyanine7 anti-mouse CD150 (SLAM)              | TC15-12F12.2 | 115914     | BioLegend, San Diego, CA                    |
| PE anti-mouse CD127 (IL-7Rα)                     | A7R34        | 135010     | BioLegend, San Diego, CA                    |
| Brilliant Violet 785™ anti-mouse CD45.1          | A20          | 110743     | BioLegend, San Diego, CA                    |
| PE/Cyanine7 anti-mouse CD45.2                    | 104          | 109830     | BioLegend, San Diego, CA                    |
| APC anti-mouse Ki-67                             | 16A8         | 652406     | BioLegend, San Diego, CA                    |
| FITC anti-mouse Ki-67                            | 16A8         | 652410     | BioLegend, San Diego, CA                    |
| APC/Cyanine7 Streptavidin                        | RUO          | 405208     | BioLegend, San Diego, CA                    |
| Streptavidin e-Fluor 450                         |              | 48-4317-82 | Invitrogen™, Thermo Fisher Scientific, Inc. |
